# Supplementary material for: Chimeric synthetic reference standards enable cross-validation of positive and negative controls in SARS-CoV-2 molecular tests
Source: PubMed Central journal article supplement (PMC7846570; doi:10.1038/s41598-021-81760-0), 2021-01-29
Supplement: 41598_2021_81760_MOESM2_ESM.pdf [file 41598_2021_81760_MOESM2_ESM.pdf]

## Supplementary Materials:

# Chimeric synthetic reference standards enable cross-validation of positive and negative controls in SARS-CoV-2 molecular tests.

Bindu Swapna Madala, Andre L. M. Reis, Ira W. Deveson, William Rawlinson & Tim R. Mercer

## TABLE OF CONTENTS

Supplementary Figure 1.

P2

## APPENDIX

Supplementary Table 1 -WHO endorsed real-time RT-PCR prime/probe sets per country.

**(a)** Isolation of chimeric standards A and B plasmids and digestion with EcoRI (different exposures).

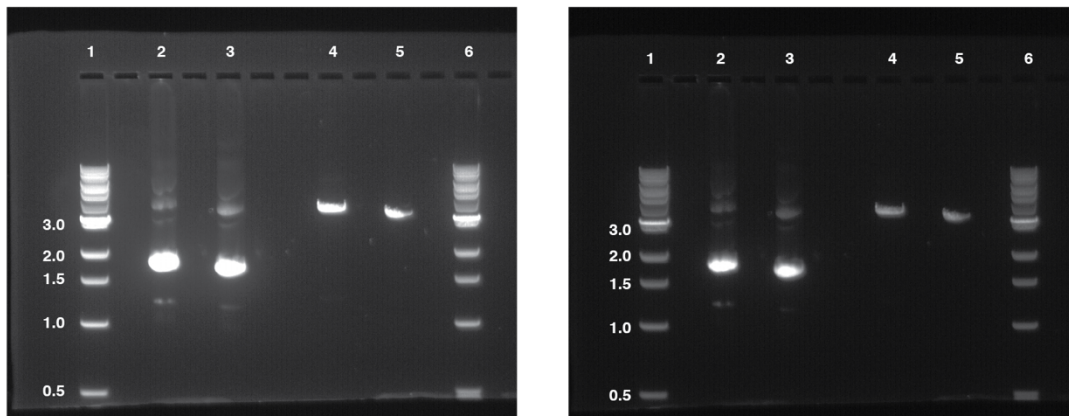

1- 1Kb ladder; 2- Standard A miniprep; 3- Standard B miniprep; 4- Standard A digestion; 5- Standard B digestion; 6- 1Kb ladder

**(b)** TapeStation quantification of *in vitro* transcribed RNA for chimeric standard A.

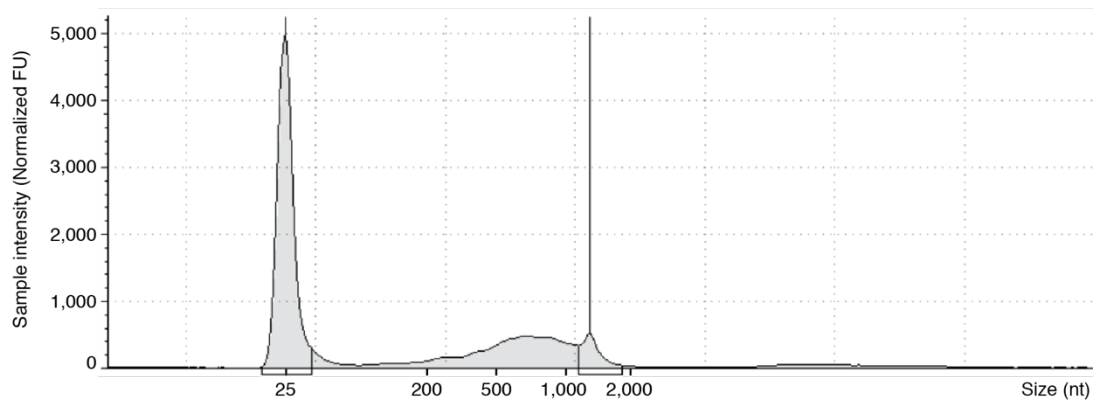

**(c)** TapeStation quantification of *in vitro* transcribed RNA for chimeric standard B.

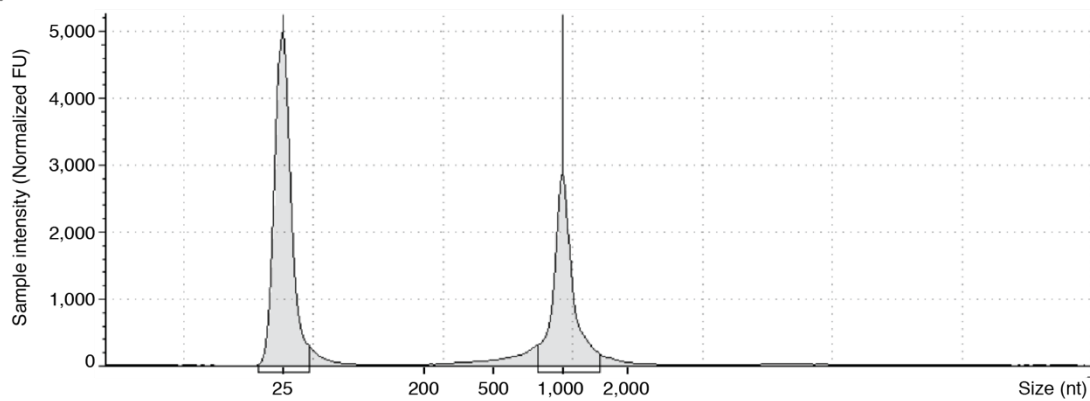

**Supplementary Figure 1.** (a) Gel electrophoresis showing miniprep results for chimeric A/B standards and digestion with EcoRI restriction enzyme. Those are photos of the same gel at different exposures. (b) TapeStation results for the purified RNA product, resulting from the *in vitro* transcription of the linearized standard A. (c) TapeStation results for the purified RNA product, resulting from the *in vitro* transcription of the linearized standard B.
